# Supplementary material for: Selective determination of dopamine using quantum-sized gold nanoparticles protected with charge selective ligands
Source: Royal Society of Chemistry journal article supplement (doi:10.1039/c2nr30481c), 2012-01-01
Supplement: c2nr30481c.pdf [file c2nr30481c.pdf]

## Electronic Supplementary Information

# Selective determination of dopamine using quantum-sized gold nanoparticles protected with charge selective ligands

*Kyuju Kwak, S. Senthil Kumar and Dongil Lee\**

*Department of Chemistry, Yonsei University, Seoul 120-749, Korea*

### Contents

|                                                                                                                             |    |
|-----------------------------------------------------------------------------------------------------------------------------|----|
| <b>Fig. S1</b> TEM image of the synthesized GS-Au <sub>25</sub> .....                                                       | s1 |
| <b>Fig. S2</b> SWV of 1 mM GS-Au <sub>25</sub> in 0.1 M KCl .....                                                           | s1 |
| <b>Fig. S3</b> CVs demonstrating the effect of scan rate on the electrochemical<br>behaviour of GS-Au <sub>25</sub> ME..... | s2 |
| <b>Fig. S4</b> CVs demonstrating the oxidation of DA and AA at bare GCE.....                                                | s2 |
| <b>Fig. S5</b> CVs of GS-Au <sub>25</sub> ME in the absence and presence of 10 μM DA<br>at different pH.....                | s3 |

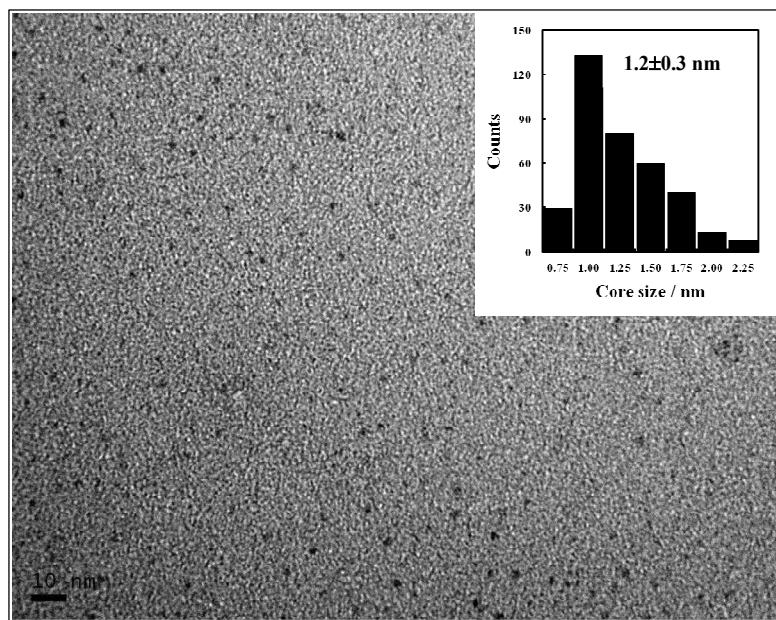

**Fig. S1** TEM image of the synthesized GS-Au<sub>25</sub>. The inset shows the histogram illustrating the core size distribution.

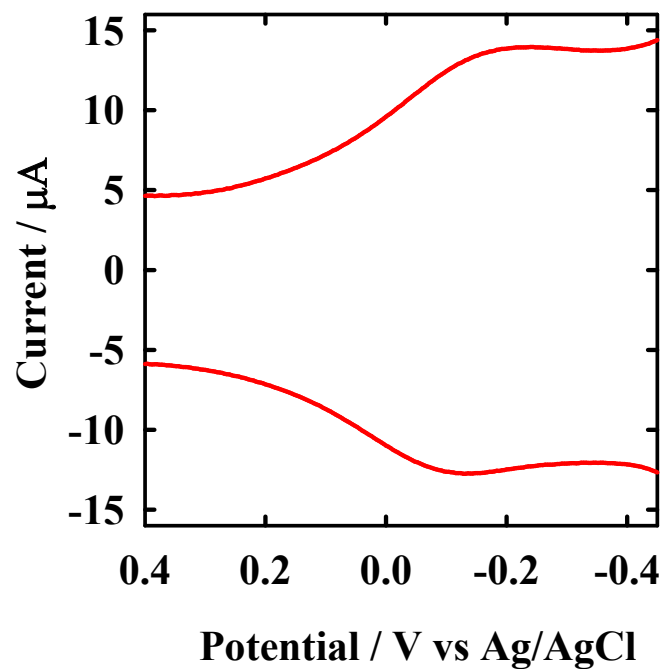

**Fig. S2** SWV of 1 mM GS-Au<sub>25</sub> dissolved in 0.1 M KCl at GCE working electrode.

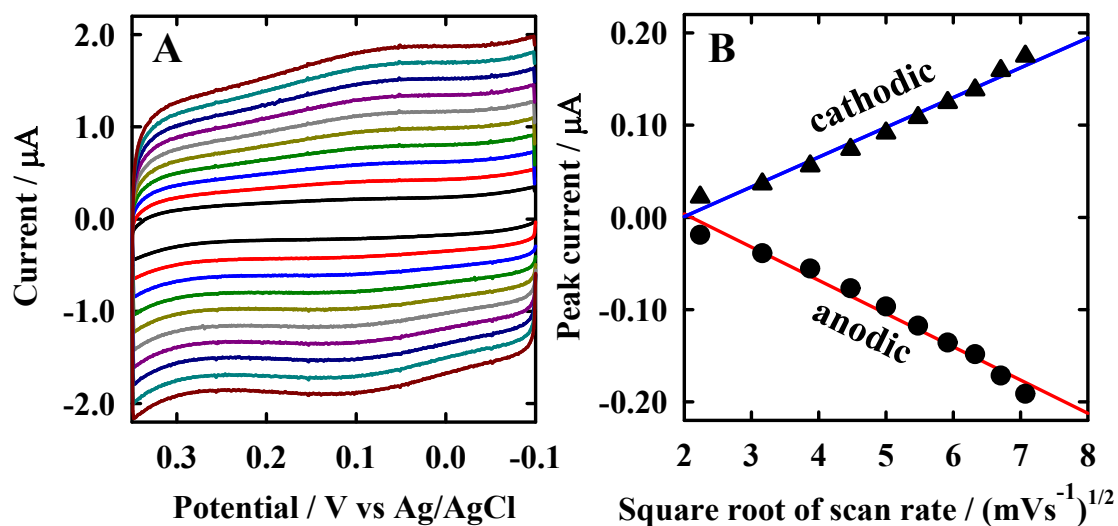

**Fig. S3** (A) CVs of GS-Au<sub>25</sub>ME at varying scan rates (inner to outer voltammograms correspond to 5, 10, 15, 20, 25, 30, 35, 40, 45 and 50 mVs<sup>-1</sup> respectively). (B) Dependence of anodic and cathodic peak currents on the square root of scan rate.

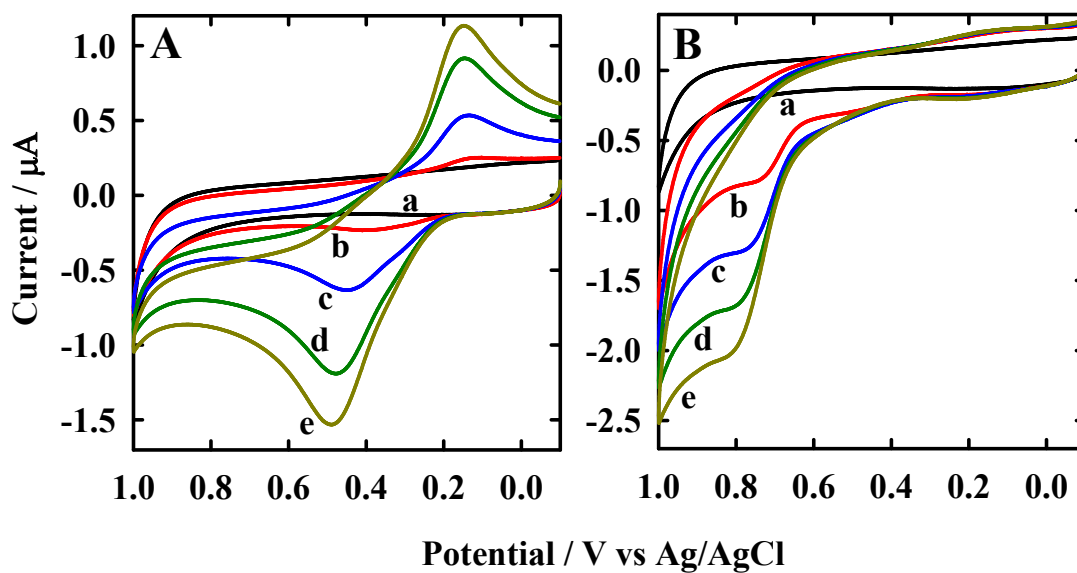

**Fig. S4** CVs demonstrating the oxidation of (A) DA and (B) AA at the bare GCE: curves a-e correspond to CVs in the presence of 0, 1, 5, 10, and 15  $\mu$ M of analyte, respectively.

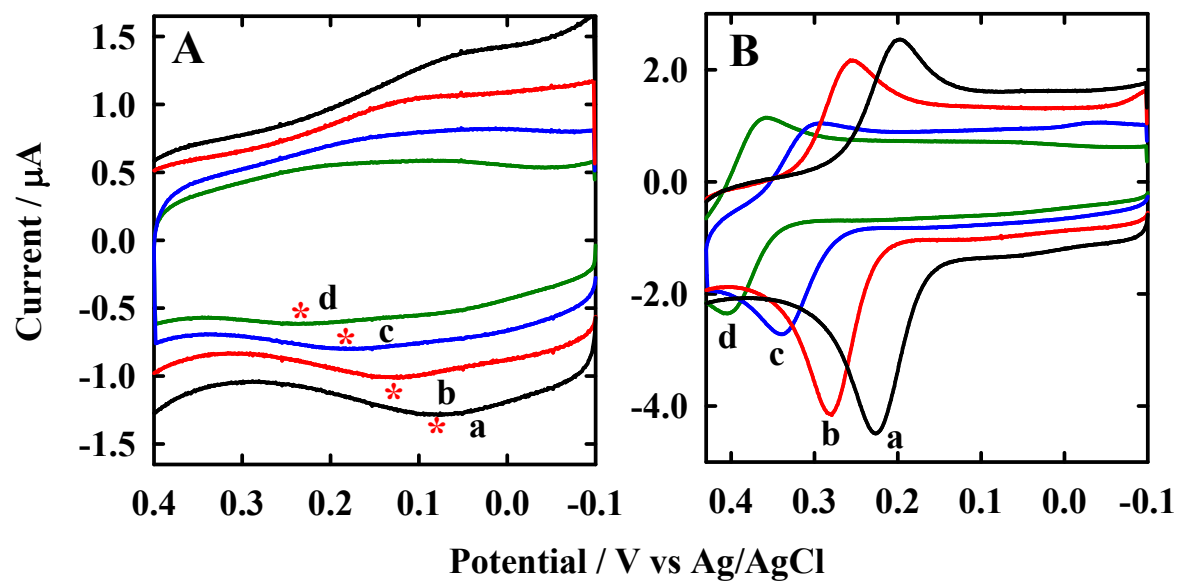

**Fig. S5** CVs of GS-Au<sub>25</sub>ME in the absence (A) and presence (B) of 10  $\mu\text{M}$  DA in 0.1 M KCl at different pHs (maintained using phthalate buffer). Curves a to d correspond to CVs recorded at pH 6, 5, 4 and 3, respectively, and \* represents the peak position.
